# Supplementary material for: Moxibustion for Chronic Fatigue Syndrome: A Systematic Review and Meta-Analysis
Source: PubMed Central journal article supplement (PMC8601810; doi:10.1155/2021/6418217), 2021-11-11
Supplement: 6418217.f1.pdf [file 6418217.f1.pdf]

## Supplementary Material: Search strategy in PubMed database

---

| Number | Search terms                                                               |
|--------|----------------------------------------------------------------------------|
| #1     | Fatigue syndrome, chronic [MeSH]                                           |
| #2     | Chronic fatigue syndrome* [Title/Abstract]                                 |
| #3     | Myalgic encephalomyelitis [Title/Abstract]                                 |
| #4     | Postviral Fatigue Syndrome* [Title/Abstract]                               |
| #5     | Infectious Mononucleosis Like Syndrome [Title/Abstract]                    |
| #6     | Royal Free Disease [Title/Abstract]                                        |
| #7     | Chronic Fatigue [Title/Abstract]                                           |
| #8     | Fatigue Disorder* [Title/Abstract]                                         |
| #9     | Systemic Exertion Intolerance Disease [Title/Abstract]                     |
| #10    | Fatigue Syndrome* [Title/Abstract]                                         |
| #11    | CFS [Title/Abstract]                                                       |
| #12    | ME [Title/Abstract]                                                        |
| #13    | #1 OR #2 OR #3 OR #4 OR #5 OR #6 OR #7 OR #8 OR #9 OR<br>#10 OR #11 OR #12 |
| #14    | Moxibustion [Mesh]                                                         |
| #15    | Moxibustion [Title/Abstract]                                               |
| #16    | Moxa [Title/Abstract]                                                      |
| #17    | Mugwort [Title/Abstract]                                                   |
| #18    | #14 OR #15 OR #16 OR #17                                                   |
| #19    | #13 And #18                                                                |

---
